1     Transcriptomic Stratification of Late-Onset Alzheimer's Cases Reveals Novel  
2                                     Genetic Modifiers of Disease Pathology

3  
4     Nikhil Milind<sup>1,2\*</sup>, Christoph Preuss<sup>1\*</sup>, Annat Haber<sup>1</sup>, Guru Ananda<sup>1</sup>, Shubhabrata  
5     Mukherjee<sup>3</sup>, Cai John<sup>1</sup>, Sarah Shapley<sup>1,4</sup>, Anna L. Tyler<sup>1</sup>, Benjamin A. Logsdon<sup>5</sup>, Paul K.  
6     Crane<sup>3</sup>, Gregory W. Carter<sup>1†</sup>

7  
8     \*These authors contributed equally to this work.

9  
10    <sup>1</sup>The Jackson Laboratory, Bar Harbor, ME, USA 04609

11    <sup>2</sup>Program in Genetics, Department of Biological Science, North Carolina State University,  
12    Raleigh, NC, USA 27695

13    <sup>3</sup>Department of Medicine, School of Medicine, University of Washington, Seattle, WA, USA  
14    98195

15    <sup>4</sup>Program in Neuroscience, Department of Biology & Geology, Baldwin Wallace University,  
16    Berea, OH, USA 44017

17    <sup>5</sup>Sage Bionetworks, Seattle, WA, USA 98121

18

19

20

21

22

23

24    Keywords: Alzheimer' disease, gene expression, co-expression modules, reproducibility

25

26    †Correspondence:

27    Gregory Carter, Ph.D.

28    The Jackson Laboratory

29    600 Main Street

30    04609 Bar Harbor, Maine

31    Phone: (207)288-6025

32    Email: [Gregory.Carter@jax.org](mailto:Gregory.Carter@jax.org)

33

34 **ABSTRACT**

35

36 Late-Onset Alzheimer's disease (LOAD) is a common, complex genetic disorder well-  
37 known for its heterogeneous pathology. The genetic heterogeneity underlying common  
38 complex diseases poses a major challenge for targeted therapies and the identification of  
39 novel disease-associated variants. Case-control approaches are often limited to examining  
40 a specific outcome in a group of heterogenous patients with different clinical characteristics.  
41 Here, we developed a novel approach to define relevant transcriptomic endophenotypes  
42 and stratify decedents based on molecular profiles in three independent human LOAD  
43 cohorts. By integrating post-mortem brain gene co-expression data from 2114 human  
44 samples with LOAD, we developed a novel quantitative, composite phenotype that can  
45 better account for the heterogeneity in genetic architecture underlying the disease. We  
46 used iterative weighted gene co-expression network analysis (WGCNA) analysis to reduce  
47 data dimensionality and to isolate gene sets that are highly co-expressed within disease  
48 subtypes and represent specific molecular pathways. We then performed single variant  
49 association testing using whole genome-sequencing data for the novel composite  
50 phenotype in order to identify genetic loci that contribute to disease heterogeneity. Distinct  
51 LOAD subtypes were identified for all three study cohorts (two in ROSMAP, three in Mayo  
52 Clinic, two in Mount Sinai Brain Bank). Single variant association analysis identified a  
53 genome-wide significant variant in *TMEM106B* (p-value  $< 5 \times 10^{-8}$ , rs1990620<sup>G</sup>) in the  
54 ROSMAP cohort that confers protection from the inflammatory LOAD subtype. Taken  
55 together, our novel approach can be used to stratify LOAD into distinct molecular subtypes  
56 based on affected disease pathways.

57

## 58 INTRODUCTION

59

60 Late-onset Alzheimer's disease (LOAD) is the most common form of dementia in the  
61 elderly. The clinical features associated with LOAD are an amnesic type of memory  
62 impairment, deterioration of language, and visuospatial deficits. In the later stages of the  
63 disease, symptoms may include motor and sensory abnormalities, gait disturbances, and  
64 seizures. Without advances in therapy, the number of symptomatic cases in the United  
65 States is predicted to rise to 13.2 million by 2050<sup>1</sup>.

66

67 Many common, complex diseases such as LOAD present with heterogeneous phenotypes  
68 due to interactions between genetic and environmental factors affecting a range of  
69 pathways and processes. LOAD has no simple form of inheritance and is governed by a  
70 common set of risk alleles across multiple genes that, in combination, have a substantial  
71 effect on disease predisposition and age of onset<sup>2</sup>. Genome-Wide Association Studies  
72 (GWAS) have become an important tool for identifying variants in complex diseases<sup>3,4</sup>.  
73 GWAS for LOAD have identified variants in over 500 genes as potential risk factors with the  
74  $\epsilon 4$  variant in *APOE* as the strongest contributor to overall disease risk<sup>2,5</sup>. LOAD has a  
75 strong polygenic component and an estimated heritability of up to 80%<sup>6</sup>. It has been  
76 challenging to transition from the identification of associated genetic variants to the  
77 molecular mechanisms that lead to the accumulation of amyloid plaques and helical tau  
78 filaments<sup>7</sup>. Furthermore, there is mounting evidence that the observed heterogeneity in  
79 LOAD is associated with multiple distinct subtypes<sup>8,9</sup>.

80

81 Gene co-expression modules tend to consist of genes that belong to the same cellular  
82 pathways or programs and help explain the global properties of the transcriptome as it

83 relates to disease risk<sup>10</sup>. Networks-based co-expression module approaches have been  
84 used to identify causal variants in Late-Onset Alzheimer's disease<sup>7,11</sup>. However, such  
85 studies have failed to account for the heterogeneity of mechanisms that lead to complex  
86 diseases. Here, we analyze whole genome sequencing (WGS) and whole transcriptome  
87 data from three independent human cohorts from the Accelerating Medicines Partnership -  
88 Alzheimer's Disease (AMP-AD) Consortium. We use gene co-expression modules to  
89 develop quantitative phenotypes that account for the complex genetic architecture and  
90 heterogeneity of LOAD to more effectively map associated variants using genome-wide  
91 association. Furthermore, the method presented in this paper can be used to identify  
92 variants in other complex diseases.

93

## 94 **METHODS**

95

### 96 **Whole genome sequencing and RNA sequencing data**

97 We obtained whole-genome sequencing and RNA sequencing (RNA-Seq) data from  
98 Synapse (<https://www.synapse.org/>) for three cohorts from the AMP-AD consortium, from  
99 the Mayo Clinic, Mount Sinai Brain Bank, and Rush University. The Mayo Clinic (Mayo)  
100 cohort consists of 276 temporal cortex (TCX) samples from 312 North American Caucasian  
101 subjects consisting of cases characterized with LOAD, pathological aging (PA), progressive  
102 supranuclear palsy (PSP), or elderly controls<sup>12</sup> (Synapse:syn5550404). The Mount Sinai  
103 Brain Bank (MSBB) cohort consists of 214 frontopolar prefrontal cortex (FP), 187 inferior  
104 temporal gyrus (IFG), 160 parahippocampal gyrus (PHG), and 187 superior temporal gyrus  
105 (STG) samples characterized with LOAD, elderly control, or mild cognitive impairment  
106 (MCI) (Synapse: syn3159438). The Rush University's Religious Orders Study and Memory  
107 and Aging Project (ROSMAP) cohort consists of 623 dorsolateral prefrontal cortex (DLPFC)

108 samples of individuals from 40 groups of religious orders from across the United States  
109 (ROS) and older adults in retirement communities in the Chicago area (MAP),  
110 characterized with LOAD, elderly control, or MCI<sup>7,13</sup> (Synapse:syn3219045). A summary of  
111 samples from each of the cohorts is provided in Table S1 and Table S2. Sex, age of death,  
112 and batch were used as covariates for normalization in the ROSMAP and Mayo data. Sex,  
113 age of death, race, and batch were used as covariates for normalization in the MSBB data.  
114 Details on post-mortem brain sample collection, tissue and RNA preparation, sequencing,  
115 and sample quality control can be found in published work related to each cohort<sup>12,14,15</sup>.

116

### 117 **Co-expression modules and iterativeWGCNA**

118 Data on human AMP-AD co-expression modules were obtained from Synapse (Synapse:  
119 syn11932957.1). The modules derive from the three independent LOAD cohorts used in  
120 this study. A detailed description on how co-expression modules were identified can be  
121 found in a recent study that identified the human co-expression modules as part of a  
122 transcriptome wide LOAD meta-analysis<sup>16</sup>. In brief, a modified procedure using five  
123 different co-expression analysis protocols followed by merging by graph clustering methods  
124 was performed to obtain 30 modules across all three cohorts (Synapse: syn2580853), 26 of  
125 which corresponded to the six tissue regions used in this study. A summary of these  
126 modules is provided in Table S3. We focused on tissues from the frontal cortex, temporal  
127 cortex, and hippocampus due to their relevance to LOAD neuropathology<sup>17</sup>. These modules  
128 are generally large, containing thousands of genes that represent multiple functions<sup>16</sup>. In  
129 order to construct more functionally-specific submodules from these AMP-AD co-  
130 expression modules, we subjected them to a repeated pruning process called  
131 iterativeWGCNA<sup>18</sup>. Briefly, iterativeWGCNA performed WGCNA on each AMP-AD co-  
132 expression module independently. The gene sets produced by this process were then

133 pruned to ensure that only highly correlated genes remained by evaluating the connectivity  
134 of the genes to the gene set eigengene. The resulting gene sets, containing highly  
135 correlated genes, were combined and the process was repeated until the gene sets  
136 converged. The algorithm then attempted to reclassify genes from the residual gene set.  
137 We specified a soft-threshold power of six, a minimum eigengene connectivity of 0.6, and a  
138 required module size of 100 to promote the generation of submodules that capture  
139 pathway-level signals. The final set of 68 submodules consisted of highly correlated and  
140 cell-type specific genes. The submodules were mutually exclusive for a given cohort but  
141 overlapped with submodules from other cohorts. A summary of these submodules is  
142 provided in Table S4. An eigengene for a given submodule is defined as the first principle  
143 component of gene expression data within each submodule.

144

#### 145 **Stratification of LOAD cases based on clustering of human co-expression** 146 **submodules**

147 Eigengene expression data for TCX, PHG, FP, and DLPFC regions was used to stratify  
148 LOAD cases in separate analyses. Clustering was performed on submodule eigengenes to  
149 determine subtypes of LOAD cases in each brain region. The NbClust R package  
150 determined the optimal number of clusters for different clustering methods by polling with  
151 the majority rule across 30 indices<sup>19</sup>. We tested agglomerative hierarchical approaches  
152 (Ward, UPGMA, WPGMA) and a reallocation approach (K-means) on the eigengene  
153 expression data and evaluated the within-cluster similarity of cases using silhouettes. The  
154 silhouette for a given object is a measure that simultaneously assesses how similar the  
155 object is to its cluster and how different the object is from all the other clusters<sup>20</sup>. Prior  
156 analysis of simulated genome-wide methylation data suggests that no one clustering  
157 method outperforms the other consistently and that mean silhouette widths can be used to

158 pick the ideal clustering method<sup>21</sup>. The silhouette plots revealed that different methods were  
159 required for the different regions to generate clusters with the largest average silhouette  
160 widths. We determined that K-means was an optimal approach for DLPFC, Ward was  
161 optimal for PHG and TCX, and UPGMA was optimal for FP after analyzing silhouette plots  
162 of clusters generated by each method for each region. An example of silhouettes used to  
163 determine the ideal clustering method for the DLPFC region is shown in Figure S1. A  
164 summary of the clusters for each brain region, considered case subtypes, is provided in  
165 Table S5. In the subtypes generated for the DLPFC region from the ROSMAP cohort, we  
166 assessed each subtype for enrichment of cognitive and pathological measures. We used  
167 Braak stages as a measure of neurofibrillary tangle burden and CERAD scores as a  
168 measure of neuritic plaque burden<sup>22,23</sup>. We also assessed the rate of decline in memory,  
169 executive function, visuospatial function, and language across the subtypes. Definitions,  
170 collection, and standardization of these decline measures can be found in previously  
171 published work<sup>24</sup>.

172

### 173 **Differential expression analysis of case subtypes**

174 For differential expression analysis, control decedents were defined as cognitively-normal  
175 and MCI decedents for PHG, FP, and DLPFC. In the case of TCX, control decedents were  
176 defined as cognitively normal, PSP, and PA decedents. For each of the regions used to  
177 stratify LOAD cases (TCX, PHG, FP, and DLPFC), we performed differential expression  
178 analysis to compare gene expression in case subtypes with control decedents as described  
179 above. We used the limma R package to perform the differential expression analysis  
180 between subtype and control decedents<sup>25</sup>. We used the clusterProfiler R package to  
181 perform KEGG and Reactome pathway analysis on differentially expressed genes to  
182 determine the signal captured by clustering on eigengene expression data<sup>26</sup>.

183

## 184 **Single-variant association of eigengene expression and subtype specificity**

185 We used EMMAX, a variance component linear mixed model, to perform single-variant  
186 association of our newly derived quantitative traits<sup>27</sup>. Each submodule eigengene was used  
187 as a quantitative trait in single-variant association for its respective brain region. For each  
188 region, we also developed a subtype specificity metric by calculating the Euclidean  
189 distance between the eigengene expression profile of each decedent and the centroid of  
190 each subtype cluster. This resulted in a vector of scores for each subtype that was mapped  
191 separately. All quantitative trait mapping results had a genomic inflation factor near one,  
192 indicating that there was no significant population substructure effect on the mapping. QQ  
193 plot analysis on the p-values showed no evidence of population substructure or  
194 confounding effects (Figure S2).

195

## 196 **Replication of suggestive and significant SNPs in other cohorts**

197 The ROSMAP cohort represented the most adequately powered cohort in the study and  
198 was used as a baseline for assessing replication of suggestive and significant SNPs in the  
199 other cohorts. SNPs were considered suggestive if quantitative trait mapping with either the  
200 submodule eigengenes or the subtype specificity metric resulted in a p-value smaller than  
201  $1 \times 10^{-5}$  and genome-wide significant if they resulted in a p-value smaller than  $5 \times 10^{-8}$ , which  
202 are standard cutoffs for GWAS. Suggestive and significant SNPs from the DLPFC region in  
203 ROSMAP were considered replicated in the TCX, FP, and PHG regions if the SNPs were  
204 associated with the submodule eigengenes or subtype specificity metric of the given region  
205 at a p-value of 0.05. Summary statistics of prior association studies were obtained from the  
206 NHGRI-EBI catalog<sup>28</sup>. Loci were considered replicated if suggestive and significant SNPs  
207 from the ROSMAP cohort were reported in these studies at a p-value smaller than  $5 \times 10^{-8}$ .



208 A summary of the entire analysis is provided in Figure S3.

209

## 210 **RESULTS**

211

### 212 **Refinement of 26 human co-expression modules identifies disease-associated** 213 **transcriptomic signals**

214 We performed an iterative gene list pruning process using the iterativeWGCNA approach to  
215 refine the 26 human co-expression modules from the AMP-AD consortium. This resulted in  
216 subsets, or submodules, of highly correlated genes that were exclusive to each module.

217 Genes that were not highly correlated to any submodule were removed since they are less  
218 likely to contribute to the overall signal of the submodule and more likely to introduce noise.

219 We compared the submodules and detected specific LOAD-associated molecular pathways  
220 and processes that are shared across the three post-mortem brain cohorts and six brain  
221 regions (Figure S4). Furthermore, incorporating information from previously defined cell-  
222 type specific markers derived from bulk RNA-Seq and single cell RNA-Seq<sup>29</sup> showed that  
223 pruning the 26 co-expression modules into 68 submodules resulted in multiple novel cell-  
224 type specific submodules (Figure 2, Figure S5). Taken together, these novel 68  
225 submodules reflect 15 specific functional consensus clusters that are associated with  
226 distinct pathways and processes related to LOAD (Figure S4).

227

### 228 **Submodule gene sets capture biological signals specific to LOAD pathology**

229 We annotated submodules using GO term enrichment, KEGG pathway enrichment, and  
230 Reactome pathway enrichment to highlight the biological specificity of co-expression  
231 signals captured by the different submodules (Table S6, Table S7, Table S8). While the 26  
232 harmonized co-expression modules were associated with five distinct consensus clusters

233 that captured a broader signal, the submodule associations were more specific in terms of  
234 functional enrichment (Figure S4). The 15 functional consensus clusters associated with  
235 the 68 submodules revealed cell-type specific signatures and elucidated gene sets for  
236 specific biological pathways, including tau-protein kinase activity, neuroinflammation,  
237 myelination, and cytoskeletal reorganization (Figure S4).

238

### 239 **Single-variant association mapping of submodule eigengenes**

240 To map the genetic drivers of biological disease-associated signals resolved by  
241 submodules, we performed single-variant association mapping of submodule eigengenes.  
242 Eigengenes were defined as the first principle component of the gene expression data  
243 associated with each submodule. They capture the variation of gene co-expression and  
244 reduce noise associated with the transcriptomic data. Genome-wide suggestive and  
245 significant loci were detected for submodules in all four brain regions (Table S9, Table S10,  
246 Table S11, Table S12). We identified multiple loci that were replicated across the cohorts at  
247 a genome-wide significant level. For instance, rs1990620 is a known variant in *TMEM106B*  
248 that was identified as genome-wide significant in the DLPFC region from the ROSMAP  
249 cohort was replicated ( $p < 5 \times 10^{-2}$ ) in all other brain regions from the Mayo and MSSM  
250 cohorts.

251

### 252 **Stratification of LOAD cases based on 68 AMP-AD co-expression submodules**

253 Clustering LOAD cases in subtypes based on eigengenes provided a method of assessing  
254 genetic drivers of heterogeneity in the transcriptome of LOAD cases. The NbClust package  
255 chose between two and three clusters for each region and the number of cases in each  
256 cluster was balanced (Table S5). The subtypes were not enriched for common LOAD-  
257 associated covariates, such as sex, *APOEε4* genotype, or years of education (Figure 4).

258 Eigengene expression profiles for each subtype were used to assess the association of  
259 each subtype with molecular and biological pathways associated with submodules. An  
260 example for the ROSMAP cohort is shown in Figure 4. We observed no significant  
261 enrichment of cognitive or neuropathological measures between the subtypes for the  
262 DLPFC region (Figure S6).

263

### 264 **ROSMAP subtypes differ in inflammatory response**

265 In order to better understand the underlying molecular differences across the novel LOAD  
266 associated subtypes in the ROSMAP cohort and to identify potential subtype specific  
267 candidate markers, differential expression analysis was performed for each of the  
268 previously defined subtypes against a set of controls (Figure 5a). Each of the two subtypes  
269 was compared to a set of 471 decedents from the ROSMAP cohort that were either  
270 cognitively normal or had mild cognitive impairment. The Venn diagram in Figure 5b depicts  
271 the comparison across the different subtypes. Interestingly, cases associated with Subtype  
272 A showed a stronger transcriptional response with 127 differentially expressed genes  
273 (adjusted p-values < 0.05, absolute log fold change > 0.5) when compared with controls. Of  
274 these genes, 86 were up-regulated and 41 were down-regulated. Among the most  
275 significantly down-regulated genes associated with Subtype A cases was the stress-  
276 response mediator corticotropin-releasing hormone (*CRH*). Overacting *CRH* signaling has  
277 been implicated in inflammatory disorders and LOAD where it has been proposed as a  
278 therapeutic target to reduce the negative effects of chronic stress related to memory  
279 function and amyloid beta ( $A\beta$ ) production<sup>30</sup>. Cases associated with Subtype B had 40  
280 differentially expressed genes (adjusted p-values < 0.05, absolute log fold change > 0.5),  
281 39 of which were down-regulated when compared to controls. Notably, two key pro-  
282 inflammatory mediators of amyloid deposition (*S100A8*, *S100A9*) were among the most

283 significantly down-regulated genes in Subtype B decedents when compared to controls  
284 (Figure 5a). Both genes, which are established inflammatory biomarkers, are part of a  
285 complex that serves as a critical link between the amyloid cascade and inflammatory  
286 events in LOAD<sup>31</sup>. Furthermore, multiple pathways linked to *S100A8/9* activation, including  
287 IL-10 signaling and complement activation were enriched across down-regulated genes in  
288 Subtype B but not in Subtype A decedents as highlighted in Figure 5c. In addition,  
289 molecular pathways linked to microglia activation (Figure S8), the immune response, and  
290 the stress response were found among the most significant pathways and gene sets (Table  
291 S13, Table S14) that differ across subtypes. Gene set enrichment analysis revealed a  
292 subset of genes linked to the KEGG osteoclast differentiation pathway (Figure S8),  
293 including known AD risk markers such as *TREM2*, *TYROBP*, and *CCL2* among others  
294 which were highly up-regulated in Subtype A cases compared to Subtype B cases. This  
295 highlights that both molecularly defined LOAD subtypes differ in their immune response  
296 and that known LOAD biomarkers, including *S100A8/A9*<sup>32</sup>, *TREM2*, and *CCL2* might be  
297 used to stratify patients based upon their inflammatory response to the observed disease  
298 state. These results were consistent with the functional annotations of the previously  
299 defined submodules that define both subtypes (Figure 4C).

300

### 301 **Single variant association mapping for ROSMAP decedents**

302 Genome wide association mapping revealed a differential enrichment of significant variants  
303 across subtypes (Figure 6, Table S9, Table S10, Table S11, Table S12). Loci were  
304 associated with one or more submodule eigengenes, as shown in Figure 6. One genome-  
305 wide suggestive allele in *TMEM106B* was identified for Subtype B (p-value <  $4 \times 10^{-6}$ ,  
306 rs1990620<sup>G</sup>). This association was replicated at a genome-wide suggestive level in  
307 association with the DLPFCbrown\_2 eigengene and at a genome-wide significant level with

308 the DLPFCbrown\_1 and DLPFCyellow\_2 eigengenes (Figure 3). DLPFCbrown\_1 contains  
309 genes related to myelination and lysosomal activity (KEGG pathways hsa00600 and  
310 hsa04142), while DLPFCyellow\_2 contains genes related to endocytosis and potassium  
311 channel activity (KEGG pathway hsa04144 and Reactome pathway R-HSA-1296071).  
312 *TMEM106B* is a known modifier of neurodegenerative disease and cognitive aging, which  
313 has been previously linked with cognitive performance<sup>33</sup>. Loss of *TMEM106B* function has  
314 been shown to rescue lysosomal phenotypes related to frontotemporal dementia<sup>34</sup>. The  
315 identified protective allele rs1990620<sup>G</sup> is a known CCCTC-binding factor (CTCF) site, which  
316 has been shown to modify the inflammatory response in the course of aging<sup>35</sup>. Besides the  
317 association with *TMEM106B* in Subtype B, protective variants near *MTUS2* were identified  
318 which are in close vicinity to *HMGB1*, a locus that has been previously implicated in brain  
319 atrophy<sup>36</sup>. A differential expression analysis of haplotype carriers of the protective  
320 rs1990620<sup>G</sup> variant in *TMEM106B* showed an up-regulation of neuroactive ligand receptor  
321 interactions, while decedents carrying the risk variant showed significant up-regulation for  
322 pathways related to Osteoclast differentiation (KEGG pathway hsa04380) and  
323 neuroinflammation (data not shown).

324

### 325 **Suggestive SNPs in ROSMAP are replicated in other cohorts**

326 A total of 1326 unique SNPs representing 163 loci were genome-wide suggestive or  
327 significant (p-value <  $1 \times 10^{-5}$ ) in the DLPFC region when pooled from all 11 DLPFC  
328 eigengenes and two subtype-specific variant mapping analyses. Of these, 645 SNPs were  
329 replicated in the PHG analyses, 762 SNPs were replicated in the FP analysis, and 482  
330 SNPs were replicated in the TCX analyses (p-value <  $1 \times 10^{-2}$ ). The *TMEM106B* variant  
331 associated with dementia, rs1990620, was replicated in all cohorts. Of the 163 loci, 29 loci

332 across 27 studies had been previously reported in the NHGRI-EBI catalog such that the  
333 most significant SNP from the prior study was a suggestive SNP in the DLPFC region  
334 (Table S15, Table S16, Table S17, Table S18).

335

## 336 **DISCUSSION**

337

338 Common complex diseases such as LOAD are characterized by phenotypic heterogeneity  
339 and the presence of multiple common variants affecting disease risk. In this study, we  
340 present an analysis that uses transcriptomic co-expression data and whole-genome  
341 sequencing from multiple cohorts to dissect phenotypic heterogeneity and identify potential  
342 genetic drivers of complex trait pathology in LOAD.

343

344 Here, we used an iterative pruning approach based on 26 human post-mortem co-  
345 expression modules to generate 68 novel submodules that contained genes associated  
346 with LOAD specific biological pathways and molecular processes. Indeed, we observed  
347 that genes in the novel submodules are enriched for functional terms that were specific to  
348 pathways associated with LOAD, such as lipid modification, the TREM2/TYROBP pathway,  
349 and tau-protein kinase activity. Furthermore, submodules from all six brain regions  
350 clustered independently of the co-expression module of origin and brain region, suggesting  
351 that the genes captured in each submodule represented signals that were associated with  
352 LOAD pathology rather than cohort- or tissue-specific factors. Notably, submodules were  
353 much more specific for markers of different brain cell types, suggesting that the processes  
354 associated with submodules represent the pathological signals from these specific cell  
355 types. This is in line with recent studies showing that different cell types in the brain play  
356 specific roles at different stages in the pathogenesis of LOAD<sup>37</sup>. Taken together, our results

357 demonstrate that the novel human co-expression submodules identified in this study  
358 capture cell-type specific pathways associated with LOAD pathogenesis in the brain.

359

360 Mapping the eigengene expression for individual submodules represents a pathway- or  
361 process-level alternative to expression quantitative trait locus (eQTL) mapping for each  
362 individual transcript. Since the human co-expression submodules represented pathological,  
363 cell-type specific pathways in LOAD brain tissue, mapping eigengene expression for  
364 decedents was expected to identify genetic drivers of LOAD pathology. RNA-Seq data from  
365 post-mortem brain tissue in human cohorts contains a strong immune signal, as evidenced  
366 by repeated identification of genetic loci related to microglial response in meta-analyses  
367 with increasingly large cohorts<sup>5,38</sup>. Using submodule eigengenes as quantitative traits for  
368 single-variant association provided an opportunity to identify genetic drivers of biological  
369 processes that are known to be drivers of early LOAD pathogenesis, such as astrogliosis,  
370 neuronal plasticity, myelination, and vascular blood brain barrier interactions<sup>37</sup>. Suggestive  
371 variants identified were unique to subsets of submodules. For instance, the *TMEM106B*  
372 locus was associated at a genome-wide significant level with the DLPFCbrown\_1 and  
373 DLPFCyellow\_2 eigengenes (Figure 3), representing processes related to oligodendrocytic  
374 myelination, lysosomal activity, endocytosis, and potassium channel activity. The  
375 *TMEM106B* locus has been implicated in cognitive aging, with functional consequences in  
376 frontotemporal dementia related to lysosomal activity<sup>33-35</sup>. A submodule of particular  
377 interest is the microglia-associated submodule DLPFCblue\_3, which contains genes  
378 related to the TREM2/TYROBP cascade. The *FAM110A* locus is close to rs1014897 and  
379 the *CNTNAP5* locus is close to rs76854344, both variants have been previously associated  
380 with posterior cortical atrophy and LOAD<sup>39</sup>. The *NTM* locus is close to rs1040103, a variant  
381 that has been associated with white blood cell count<sup>40</sup>. Thus, quantitative trait mapping of



382 single variants using eigengene expression for submodules presented in this study can  
383 elucidate genetic factors specific to associated pathological pathways.

384

385 Furthermore, eigengenes represent a dimensional reduction of transcriptomic data onto  
386 axes of pathological relevance. Thus, we expected that clustering on the eigengene  
387 expression of LOAD cases would generate pathway-level profiles of putative molecular  
388 LOAD subtypes based on case heterogeneity. As anticipated, we observed that average  
389 eigengene expression was enriched by subtype for multiple submodules in all four brain  
390 regions tested. Strikingly, these enrichments were diametric in the subtypes generated for  
391 LOAD cases, an example of which is presented for the DLPFC region in Figure 4. Similar  
392 enrichment patterns were identified in the other three brain regions. These results suggest  
393 that the biological programs identified by submodules in this study align themselves along  
394 the heterogeneity of transcriptomic data present in LOAD cases across multiple cohorts  
395 rather than differentiating solely based on cases and controls. Furthermore, the  
396 stratification of patients based on submodule expression profiles demonstrated that there is  
397 significant variation in immune response in post-mortem brain tissue, a process that is  
398 considered a hallmark of LOAD pathogenesis (Figure 5, Figure S8). Variants associated  
399 with the subtype specificity metric overlapped with the variants associated with individual  
400 submodule eigengenes (Figure 6). This suggests that the genetic factors that influenced  
401 subtypes can be dissected into loci driving specific submodules. Furthermore, the  
402 deconstruction of genetic loci can provide the basis for more targeted treatment of  
403 dysfunctional pathways that contribute to different subtypes of LOAD.

404

405 Our subtypes in the DLPFC brain region of the ROSMAP cohort represent differences in  
406 transcriptomic profiles of LOAD cases derived from post-mortem RNA-Seq data. A lack of



407 temporal data makes it challenging to decisively interpret these profiles. The subtypes may  
408 represent distinct LOAD endpoints, differences in disease severity, environmental effects,  
409 or phases of molecular pathology. Neither subtype was associated with cognitive or  
410 neuropathological outcome (Figure S6). Furthermore, covariates such as sex, *APOE*  
411 genotype, and years of education were not significantly enriched in any given subtype  
412 (Figure 4). This suggests that the transcriptomic profiles do not represent transitions in  
413 disease severity and that there are overall risk factors not reflected in transcriptomic  
414 subtypes. Furthermore, both subtypes are associated with unique loci that belong to the  
415 same community of loci detected by submodule mapping (Figure 6), indicating that the  
416 subtypes capture various combinations of genetic elements that lead to LOAD pathology.  
417 While suggestive, these transcriptomic LOAD subtypes will require further validation in  
418 cohorts that adequately control for disease progression.

419

420 The methodology presented in this study is not limited to RNA-Seq data and can be  
421 performed on other omics, such as proteomics or metabolomics. As such data become  
422 available for the decedents in these cohorts, this analysis can be expanded across these  
423 additional informative dimensions.

424

## 425 **ACKNOWLEDGEMENTS**

426

427 This study was supported by the National Institutes of Health grant U54 AG 054354.  
428 Additional funding was provided by the Barbara H. Sanford Endowed Scholarship Fund, the  
429 Robert E. Garrity Cooperative Education Fund as well as the Park and Goldwater  
430 Scholarship funds. We thank A. Saykin and K. Nho for helpful conversations.

431

432 The results published here are in whole or in part based on data obtained from the AMP-  
433 AD Knowledge Portal ([doi:10.7303/syn2580853](https://doi.org/10.7303/syn2580853)). Study data were provided by the Rush  
434 Alzheimer's Disease Center, Rush University Medical Center, Chicago. Data collection was  
435 supported through funding by NIA grants P30AG10161, R01AG15819, R01AG17917,  
436 R01AG30146, R01AG36836, U01AG32984, U01AG46152, the Illinois Department of  
437 Public Health, and the Translational Genomics Research Institute.

438

439 The results published here are in whole or in part based on data obtained from the AMP-  
440 AD Knowledge Portal ([doi:10.7303/syn2580853](https://doi.org/10.7303/syn2580853)). Study data were provided by the following  
441 sources: The Mayo Clinic Alzheimer's Disease Genetic Studies, led by Dr. Nilufer Taner  
442 and Dr. Steven G. Younkin, Mayo Clinic, Jacksonville, FL using samples from the Mayo  
443 Clinic Study of Aging, the Mayo Clinic Alzheimer's Disease Research Center, and the Mayo  
444 Clinic Brain Bank. Data collection was supported through funding by NIA grants P50  
445 AG016574, R01 AG032990, U01 AG046139, R01 AG018023, U01 AG006576, U01  
446 AG006786, R01 AG025711, R01 AG017216, R01 AG003949, NINDS grant R01  
447 NS080820, CurePSP Foundation, and support from Mayo Foundation. Study data includes  
448 samples collected through the Sun Health Research Institute Brain and Body Donation  
449 Program of Sun City, Arizona. The Brain and Body Donation Program is supported by the  
450 National Institute of Neurological Disorders and Stroke (U24 NS072026 National Brain and  
451 Tissue Resource for Parkinson's Disease and Related Disorders), the National Institute on  
452 Aging (P30 AG19610 Arizona Alzheimer's Disease Core Center), the Arizona Department  
453 of Health Services (contract 211002, Arizona Alzheimer's Research Center), the Arizona  
454 Biomedical Research Commission (contracts 4001, 0011, 05-901 and 1001 to the Arizona  
455 Parkinson's Disease Consortium) and the Michael J. Fox Foundation for Parkinson's  
456 Research. The results published here are in whole or in part based on data obtained from

457 the AMP-AD Knowledge Portal ([doi:10.7303/syn2580853](https://doi.org/10.7303/syn2580853)). These data were generated  
458 from postmortem brain tissue collected through the Mount Sinai VA Medical Center Brain  
459 Bank and were provided by Dr. Eric Schadt from Mount Sinai School of Medicine.

460

#### 461 **AUTHOR'S CONTRIBUTIONS**

462

463 NM, CP, AH, GA and CJ performed the genetic and transcriptomic analysis. SS annotated  
464 the functional variants. SM and PC provided cognitive and phenotype data for the analysis.  
465 BL and AT provided additional transcriptomic data for the analysis. GWC supervised and  
466 designed the project. NM, CP and GWC wrote the manuscript. All authors read and  
467 approved the final manuscript.

468

#### 469 **CONSENT FOR PUBLICATION**

470

471 All authors have approved of the manuscript and agree with its submission.

472

#### 473 **COMPETING INTERESTS**

474

475 *Not applicable.*

476

477 **REFERENCES**

478

- 479 1. Cummings, J. L. Alzheimer's Disease. *N. Engl. J. Med.* **351**, 56–67 (2004).
- 480 2. Bertram, L. & Tanzi, R. E. Thirty years of Alzheimer's disease genetics: the  
481 implications of systematic meta-analyses. *Nat. Rev. Neurosci.* **9**, 768–778 (2008).
- 482 3. Kilpinen, H. & Barrett, J. C. How next-generation sequencing is transforming complex  
483 disease genetics. *Trends Genet.* **29**, 23–30 (2013).
- 484 4. Risch, N. & Merikangas, K. The future of genetic studies of complex human diseases.  
485 *Science* (1996). doi:10.1126/science.273.5281.1516
- 486 5. Jansen, I. E. *et al.* Genome-wide meta-analysis identifies new loci and functional  
487 pathways influencing Alzheimer's disease risk. *Nat. Genet.* **51**, 404–413 (2019).
- 488 6. Verheijen, J. & Sleegers, K. Understanding Alzheimer Disease at the Interface  
489 between Genetics and Transcriptomics. *Trends Genet.* **34**, 434–447 (2018).
- 490 7. Mostafavi, S. *et al.* A molecular network of the aging human brain provides insights  
491 into the pathology and cognitive decline of Alzheimer's disease. *Nat. Neurosci.* **21**,  
492 811–819 (2018).
- 493 8. Mukherjee, S. *et al.* Genetic data and cognitively-defined late-onset Alzheimer's  
494 disease subgroups. *Mol. Psychiatry* 1–10 (2018). doi:10.1101/367615
- 495 9. Ferreira, D. *et al.* Distinct subtypes of Alzheimer's disease based on patterns of brain  
496 atrophy: longitudinal trajectories and clinical applications. *Sci. Rep.* **7**, 1–13 (2017).
- 497 10. Langfelder, P. & Horvath, S. Eigengene networks for studying the relationships  
498 between co-expression modules. *BMC Syst. Biol.* **1**, 54 (2007).
- 499 11. Zhang, B. *et al.* Integrated systems approach identifies genetic nodes and networks  
500 in late-onset Alzheimer's disease. *Cell* **153**, 707–20 (2013).
- 501 12. Allen, M. *et al.* Human whole genome genotype and transcriptome data for

- 502 Alzheimer's and other neurodegenerative diseases. *Sci. Data* **3**, (2016).
- 503 13. Chibnik, L. B. *et al.* Susceptibility to neurofibrillary tangles: role of the PTPRD locus  
504 and limited pleiotropy with other neuropathologies. *Mol. Psychiatry* **23**, 1521–1529  
505 (2018).
- 506 14. Wang, M. *et al.* The Mount Sinai cohort of large-scale genomic, transcriptomic and  
507 proteomic data in Alzheimer's disease. *Sci. Data* **5**, 1–16 (2018).
- 508 15. De Jager, P. L. *et al.* A multi-omic atlas of the human frontal cortex for aging and  
509 Alzheimer's disease research. *Sci. Data* **5**, 1–13 (2018).
- 510 16. Logsdon, B. *et al.* Meta-analysis of the human brain transcriptome identifies  
511 heterogeneity across human AD coexpression modules robust to sample collection  
512 and methodological approach. *bioRxiv* 510420 (2019). doi:10.1101/510420
- 513 17. DeTure, M. A. & Dickson, D. W. The neuropathological diagnosis of Alzheimer  
514 disease. *Mol. Neurodegener.* **14**, 1–18 (2019).
- 515 18. Greenfest-Allen, E., Cartailier, J.-P., Magnuson, M. A. & Stoeckert, C. J.  
516 iterativeWGCNA: iterative refinement to improve module detection from WGCNA co-  
517 expression networks. *bioRxiv* 234062 (2017). doi:10.1101/234062
- 518 19. Charrad, M., Ghazzali, N., Boiteau, V. & Niknafs, A. **NbClust**: An R Package for  
519 Determining the Relevant Number of Clusters in a Data Set. *J. Stat. Softw.* **61**, 1–36  
520 (2014).
- 521 20. Rousseeuw, P. J. Silhouettes: A graphical aid to the interpretation and validation of  
522 cluster analysis. *J. Comput. Appl. Math.* **20**, 53–65 (1987).
- 523 21. Clifford, H., Wessely, F., Pendurthi, S. & Emes, R. D. Comparison of Clustering  
524 Methods for Investigation of Genome-Wide Methylation Array Data. *Front. Genet.* **2**,  
525 88 (2011).
- 526 22. Braak, H., Thal, D. R., Ghebremedhin, E. & Del Tredici, K. Stages of the Pathologic

- 527 Process in Alzheimer Disease. *J. Neuropathol. Exp. Neurol.* **70**, 960–969 (2011).
- 528 23. Wilson, R. S., Arnold, S. E., Schneider, J. A., Li, Y. & Bennett, D. A. Chronic Distress,  
529 Age-Related Neuropathology, and Late-Life Dementia. *Psychosom. Med.* **69**, 47–53  
530 (2007).
- 531 24. Mukherjee, S. *et al.* Genetic data and cognitively defined late-onset Alzheimer’s  
532 disease subgroups. *Mol. Psychiatry* (2018). doi:10.1038/s41380-018-0298-8
- 533 25. Ritchie, M. E. *et al.* limma powers differential expression analyses for RNA-  
534 sequencing and microarray studies. *Nucleic Acids Res.* **43**, e47–e47 (2015).
- 535 26. Yu, G., Wang, L.-G., Han, Y. & He, Q.-Y. clusterProfiler: an R Package for  
536 Comparing Biological Themes Among Gene Clusters. *Omi. A J. Integr. Biol.* **16**, 284–  
537 287 (2012).
- 538 27. Kang, H. M. *et al.* Variance component model to account for sample structure in  
539 genome-wide association studies. *Nat. Genet.* **42**, 348–354 (2010).
- 540 28. Buniello, A. *et al.* The NHGRI-EBI GWAS Catalog of published genome-wide  
541 association studies, targeted arrays and summary statistics 2019. *Nucleic Acids Res.*  
542 **47**, D1005–D1012 (2019).
- 543 29. McKenzie, A. T. *et al.* Brain Cell Type Specific Gene Expression and Co-expression  
544 Network Architectures. *Sci. Rep.* **8**, 8868 (2018).
- 545 30. Futch, H. S., Croft, C. L., Truong, V. Q., Krause, E. G. & Golde, T. E. Targeting  
546 psychologic stress signaling pathways in Alzheimer’s disease. *Mol. Neurodegener.*  
547 **12**, 49 (2017).
- 548 31. Vogl, T., Gharibyan, A. L. & Morozova-Roche, L. A. Pro-Inflammatory S100A8 and  
549 S100A9 Proteins: Self-Assembly into Multifunctional Native and Amyloid Complexes.  
550 *Int. J. Mol. Sci.* **13**, 2893 (2012).
- 551 32. Horvath, I. *et al.* Pro-inflammatory S100A9 Protein as a Robust Biomarker

- 552 Differentiating Early Stages of Cognitive Impairment in Alzheimer's Disease. *ACS*  
553 *Chem. Neurosci.* **7**, 34–39 (2016).
- 554 33. White, C. C. *et al.* Identification of genes associated with dissociation of cognitive  
555 performance and neuropathological burden: Multistep analysis of genetic, epigenetic,  
556 and transcriptional data. *PLOS Med.* **14**, e1002287 (2017).
- 557 34. Klein, Z. A. *et al.* Loss of TMEM106B Ameliorates Lysosomal and Frontotemporal  
558 Dementia-Related Phenotypes in Progranulin-Deficient Mice. *Neuron* **95**, 281–296.e6  
559 (2017).
- 560 35. Gallagher, M. D. *et al.* A Dementia-Associated Risk Variant near TMEM106B Alters  
561 Chromatin Architecture and Gene Expression. *Am. J. Hum. Genet.* **101**, 643–663  
562 (2017).
- 563 36. Furney, S. J. *et al.* Genome-wide association with MRI atrophy measures as a  
564 quantitative trait locus for Alzheimer's disease. *Mol. Psychiatry* **16**, 1130–8 (2011).
- 565 37. De Strooper, B. & Karran, E. The Cellular Phase of Alzheimer's Disease. *Cell* **164**,  
566 603–615 (2016).
- 567 38. Lambert, J. C. *et al.* Meta-analysis of 74,046 individuals identifies 11 new  
568 susceptibility loci for Alzheimer's disease. *Nat. Genet.* **45**, 1452–1458 (2013).
- 569 39. Schott, J. M. *et al.* Genetic risk factors for the posterior cortical atrophy variant of  
570 Alzheimer's disease. *Alzheimer's Dement.* **12**, 862–871 (2016).
- 571 40. Kichaev, G. *et al.* Leveraging Polygenic Functional Enrichment to Improve GWAS  
572 Power. *Am. J. Hum. Genet.* **104**, 65–75 (2019).
- 573
- 574



## FIGURES

A

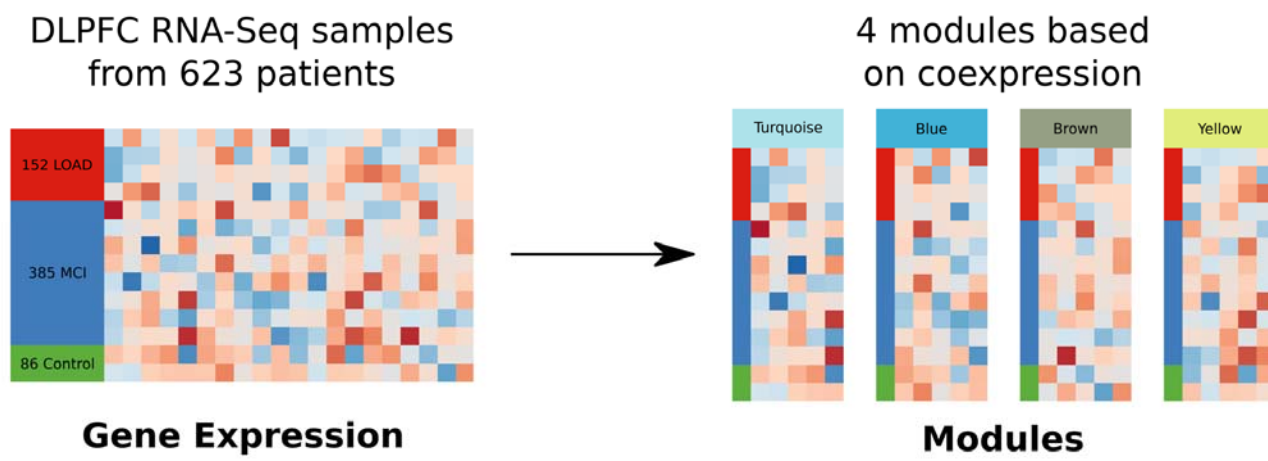

B

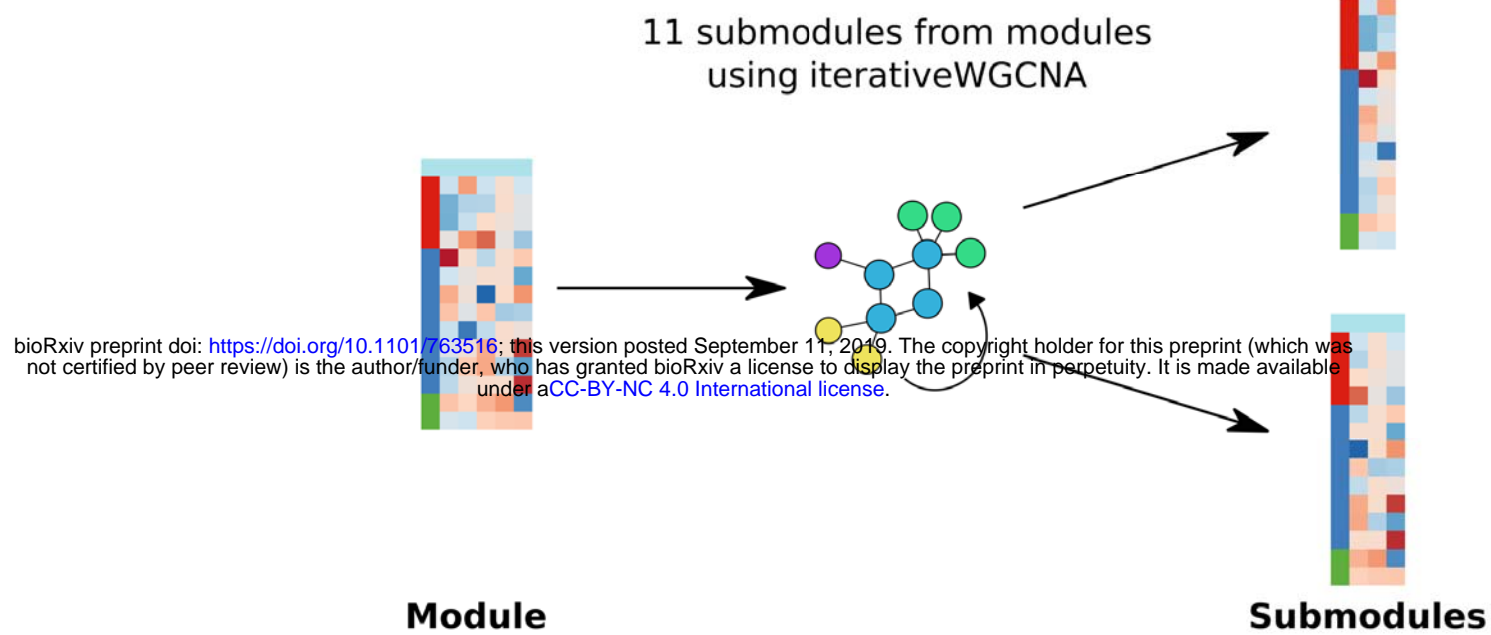

C

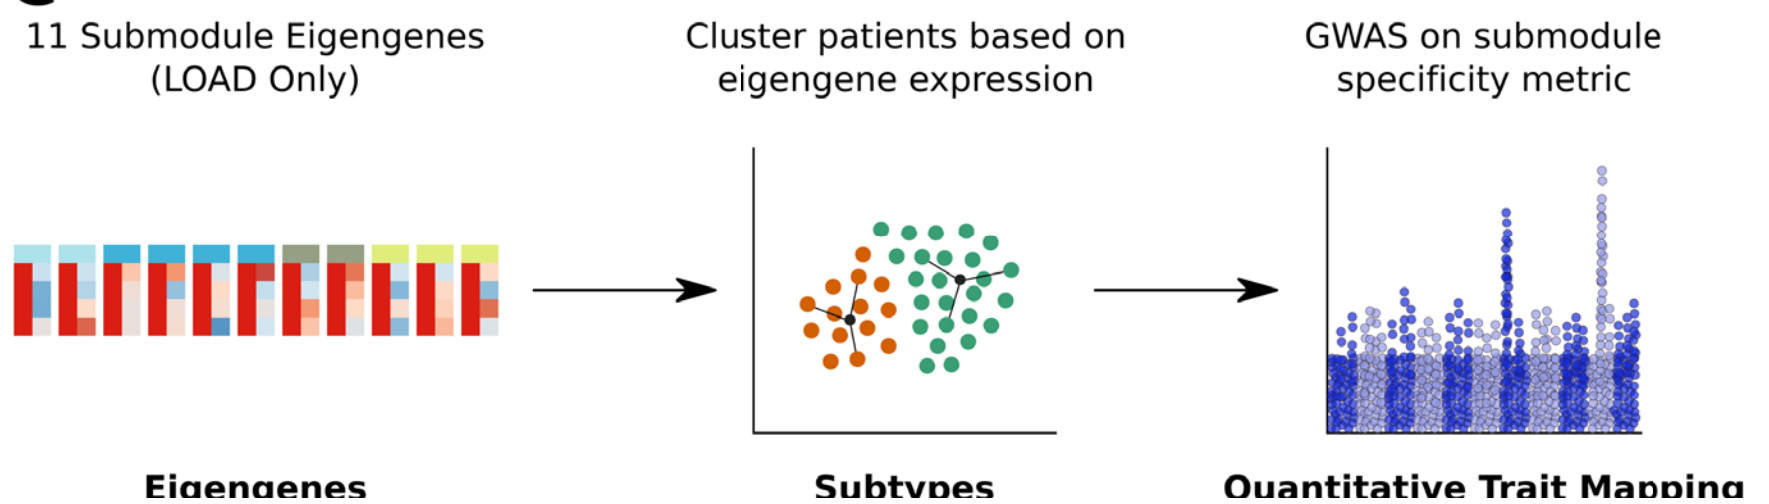

579 **Figure 1: Methodology used in this study to map genetic drivers of LOAD pathology in the ROSMAP cohort.** (A) RNA-  
 580 Seq was performed on dorsolateral prefrontal cortex (DLPFC) tissue from 86 control decedents, 385 decedents with Mild  
 581 Cognitive Impairment (MCI), and 152 decedents with Late-Onset Alzheimer's Disease (LOAD). A modified procedure using  
 582 seven different WGCNA protocols, followed by merging by clustering methods, was performed to obtain 4 modules based on  
 583 gene co-expression. (B) Each of the four modules was subjected to iterativeWGCNA, a procedure that repeatedly performs  
 584 WGCNA on expression data to generate highly correlated gene sets and exclude weakly correlated genes. 11 submodules  
 585 were generated from the 4 modules. (C) The eigengene, or first principal component of each submodule, was calculated for  
 586 all 11 submodules and used as a quantitative trait for single-variant association mapping. Furthermore, the eigengene  
 587 expression for LOAD cases was used to perform cluster analysis and generate subtypes of LOAD cases. A Euclidean  
 588 distance quantitative trait was developed to identify genomic loci for each subtype using single-variant association mapping.  
 589



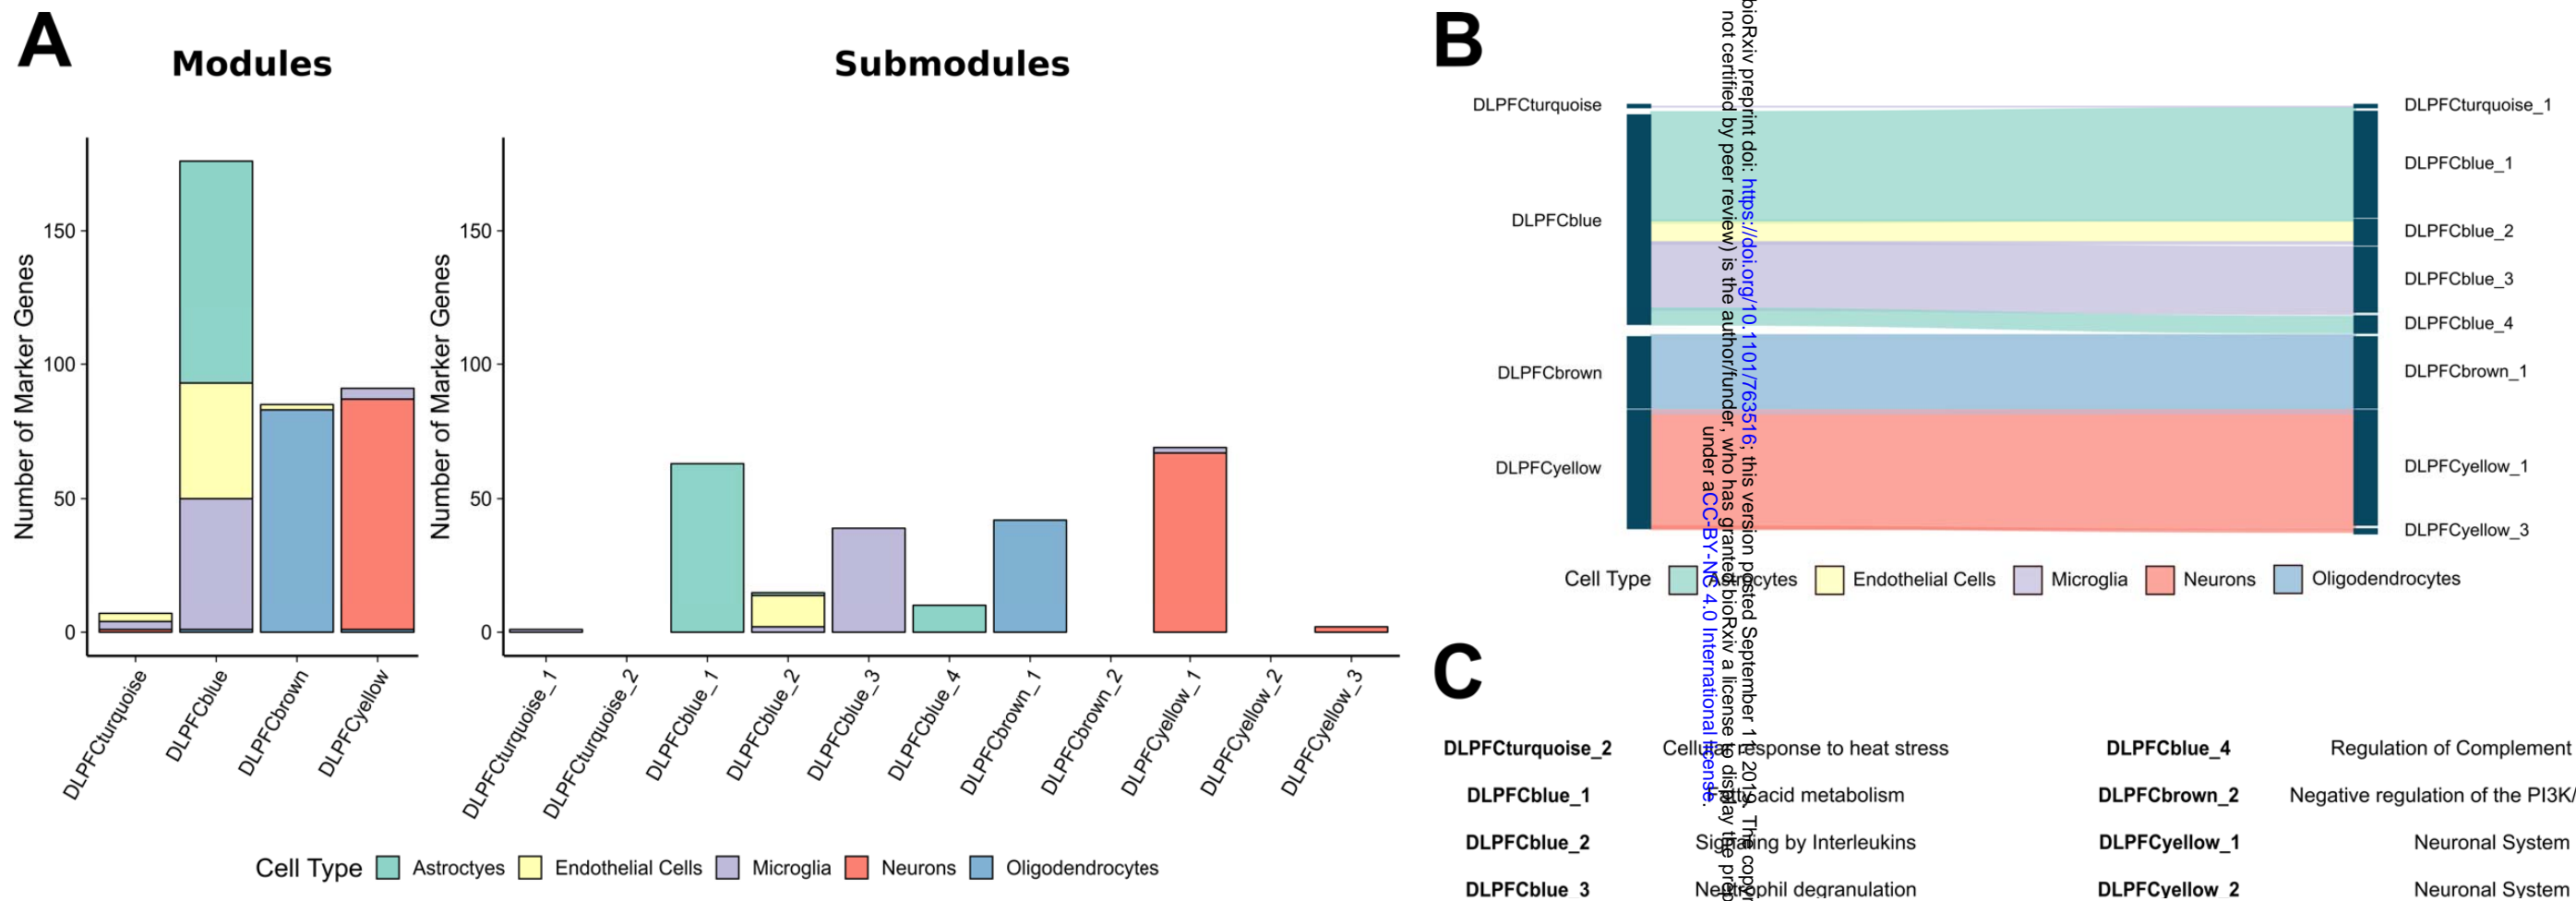

590  
591  
592  
593  
594  
595  
596

**Figure 2: Cell-type specificity of modules is refined in submodules.** (A) Cell type specific marker genes reported by McKenzie *et al.* were used to annotate modules and submodules for astrocytes, endothelial cells, microglia, neurons, and oligodendrocytes. The top 100 marker genes for each cell type were used. The iterativeWGCNA procedure generated submodules that were more cell-type specific than their modules of origin. (B) A Sankey diagram demonstrates which cell-type specific markers from modules were found in submodules generated using iterativeWGCNA for the ROSMAP cohort. (C) Gene set enrichment analysis for Reactome pathways was performed for each submodule gene list. The top enriched Reactome pathways for submodules are reported.

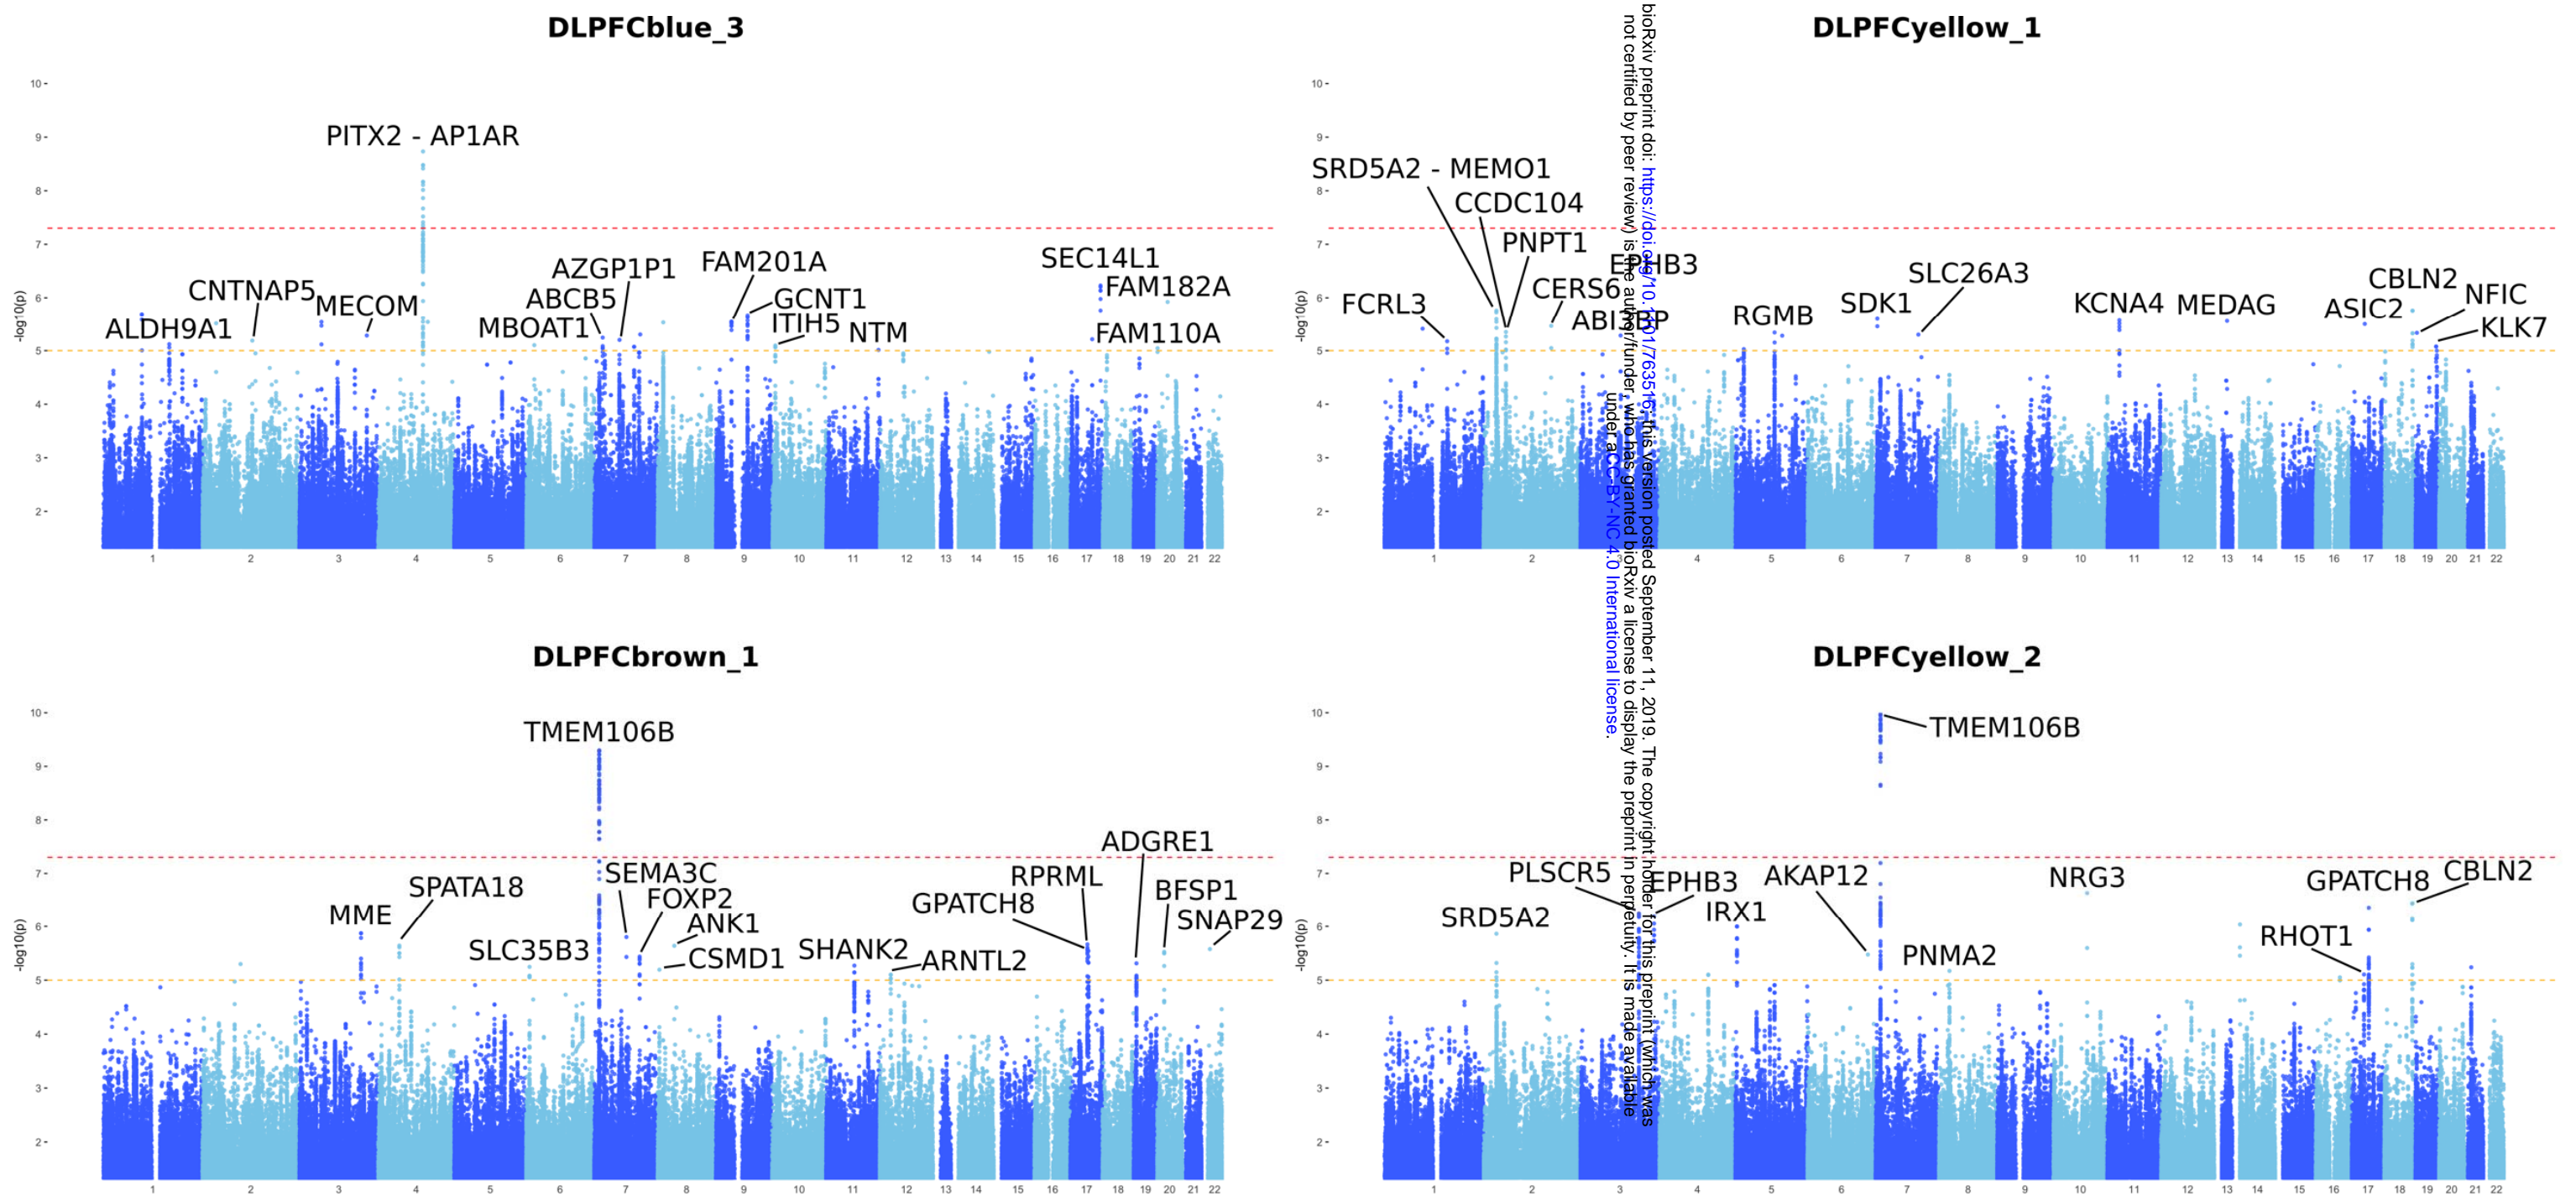

597  
 598  
 599 **Figure 3: Manhattan plots of single-variant association of select submodule eigengenes in ROSMAP.** Eigengene expression for each submodule was used as a quantitative trait when performing single-variant  
 600 mapping. These Manhattan plots were generated for select DLPFC region submodule eigengenes. Multiple submodule eigengenes were associated with SNPs at a genome-wide significance level of  $p = 5e-08$  (red  
 601 dotted line). Loci of interest are annotated with the gene closest to the region. Some SNPs were also detected at a genome-wide suggestive level of  $p = 1e-05$  (yellow dotted line). DLPFCblue\_3 contains genes  
 602 related to the TREM2/TYROBP pathway, an important network of genes related to microglial activation during neuroinflammation of the brain. Submodules were associated with both unique and overlapping loci. For  
 603 example, DLPFCbrown\_1 and DLPFCyellow\_2 are derived from separate co-expression modules but were both associated with the *TMEM106B* locus. Similarly, DLPFCyellow\_1 and DLPFCyellow\_2 were derived  
 604 from the same co-expression module but were associated with a mix of overlapping and unique loci.  
 605

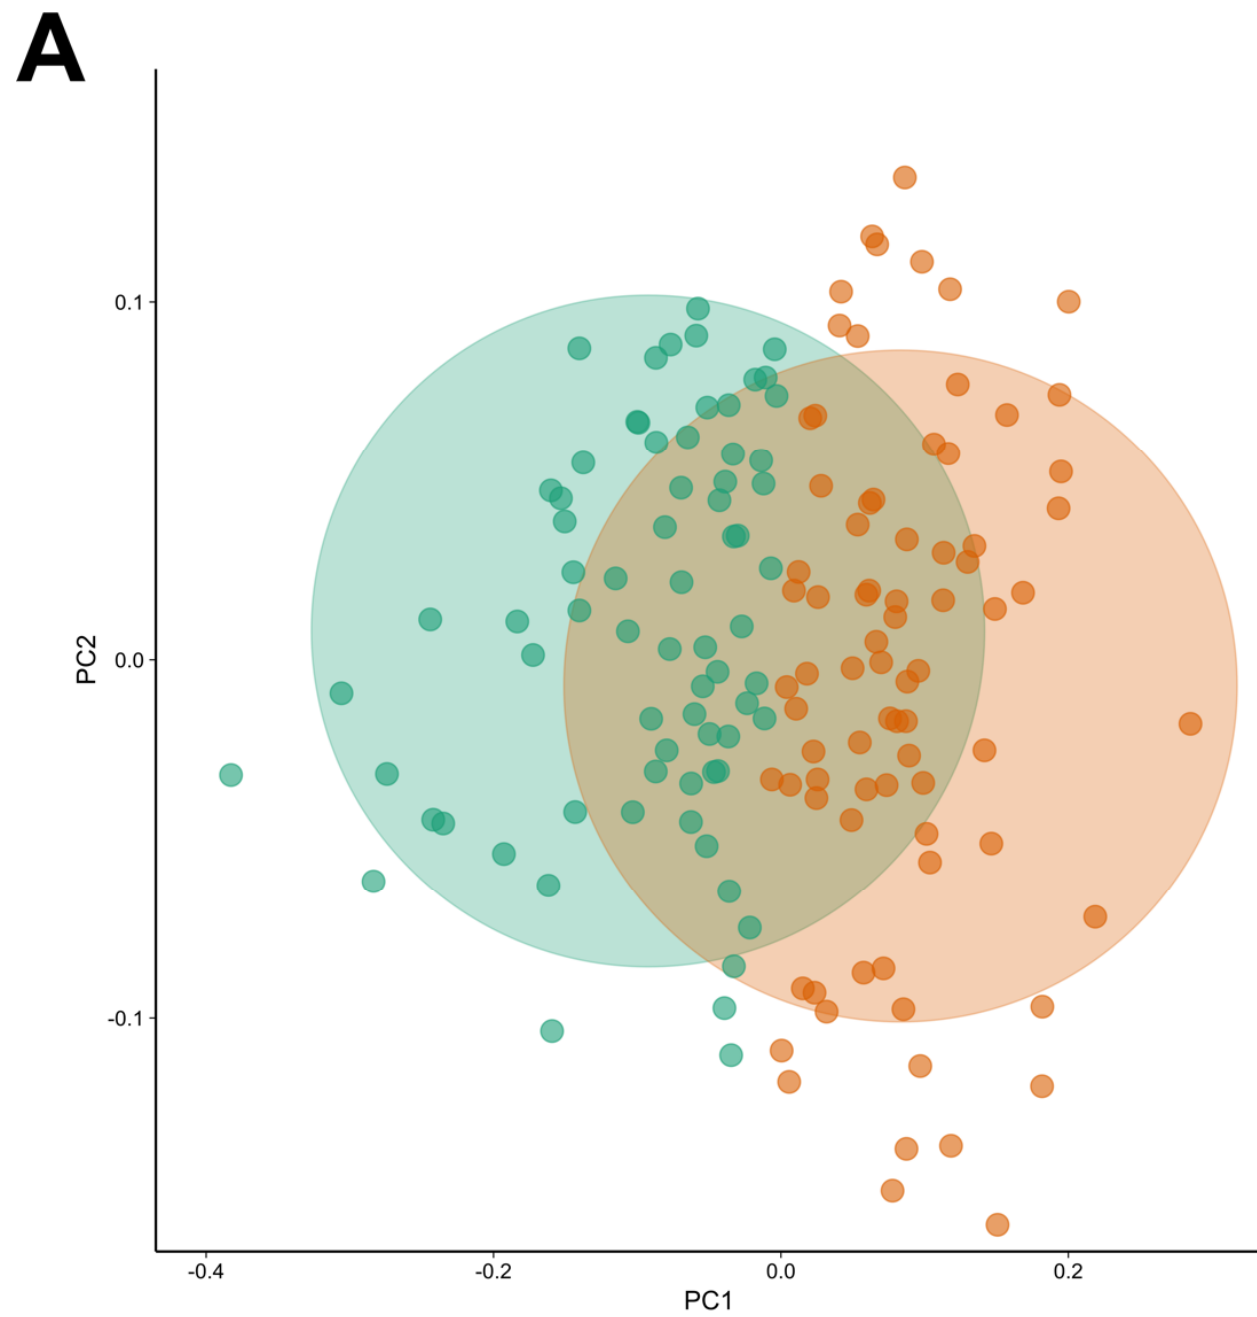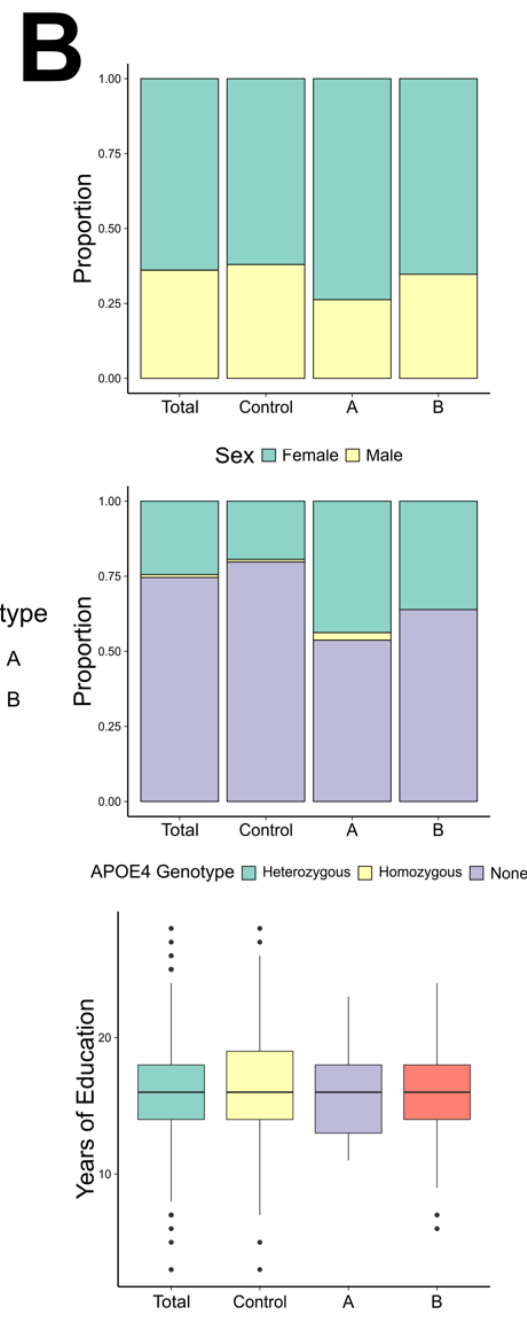

bioRxiv preprint doi: <https://doi.org/10.1101/763516>; this version posted September 11, 2019. The copyright holder for this preprint (which was not certified by peer review) is the author/funder, who has granted bioRxiv a license to display the preprint in perpetuity. It is made available under aCC-BY-NC 4.0 International license.

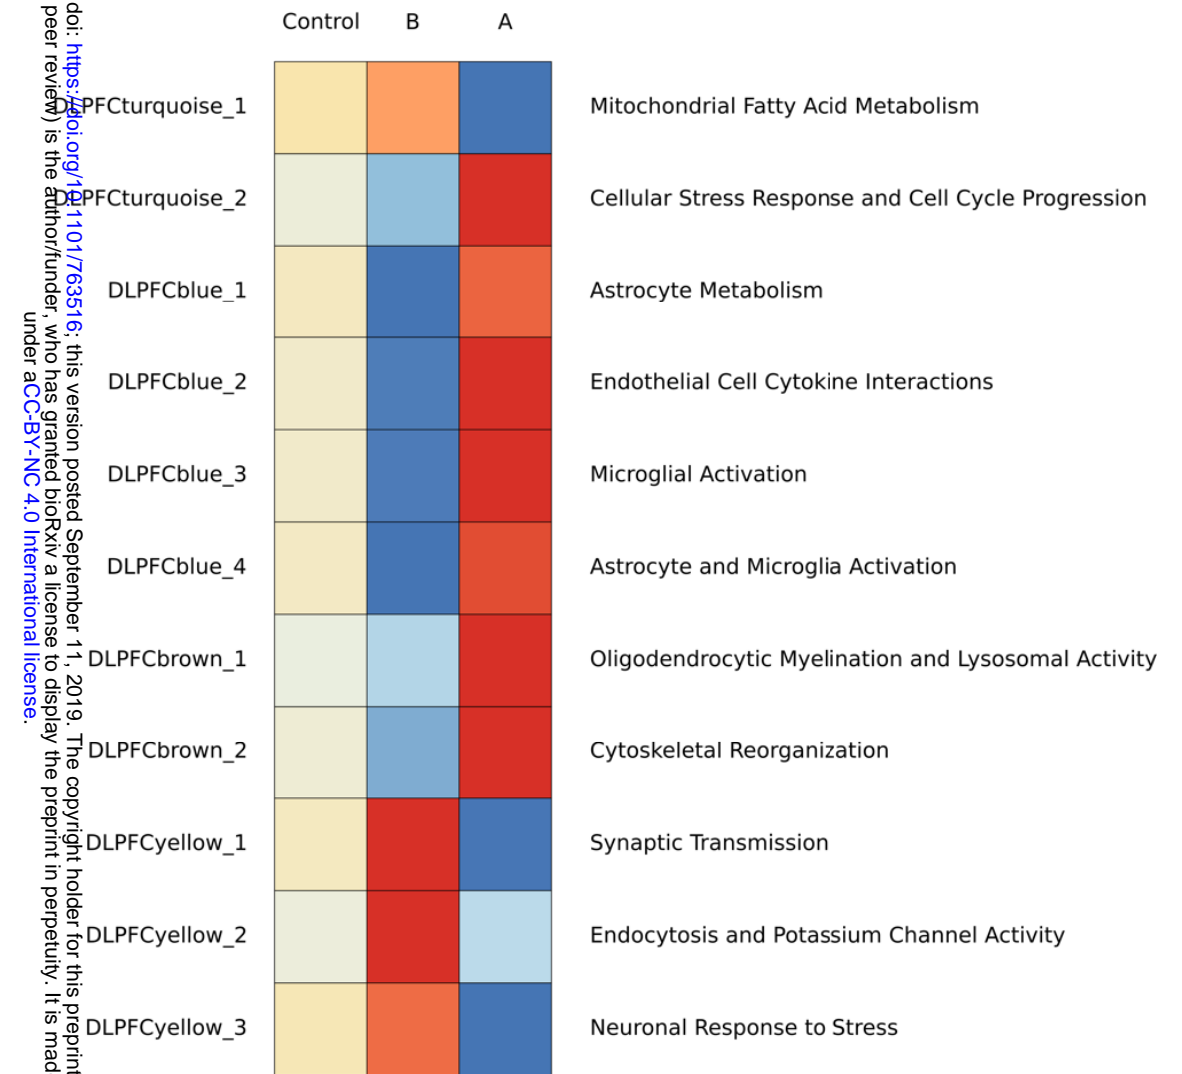

**Figure 4: Clustering on eigengene expression in ROSMAP data generates 2 subtypes.** (A) Eigengene expression was used to cluster cases into subtypes using K-Means clustering for the DLPFC region. The number of clusters were determined by democratizing results across 30 mathematical indices using the NbClust R package. Two clusters with relatively equal number of cases were generated. (B) There were no significant differences in proportion of sex, *APOEε4* genotype, and years of education between subtypes. (C) The scaled eigengene expression profile of the subtypes demonstrated a strong immune and neuronal signal when compared to control and MCI decedents.



613  
614

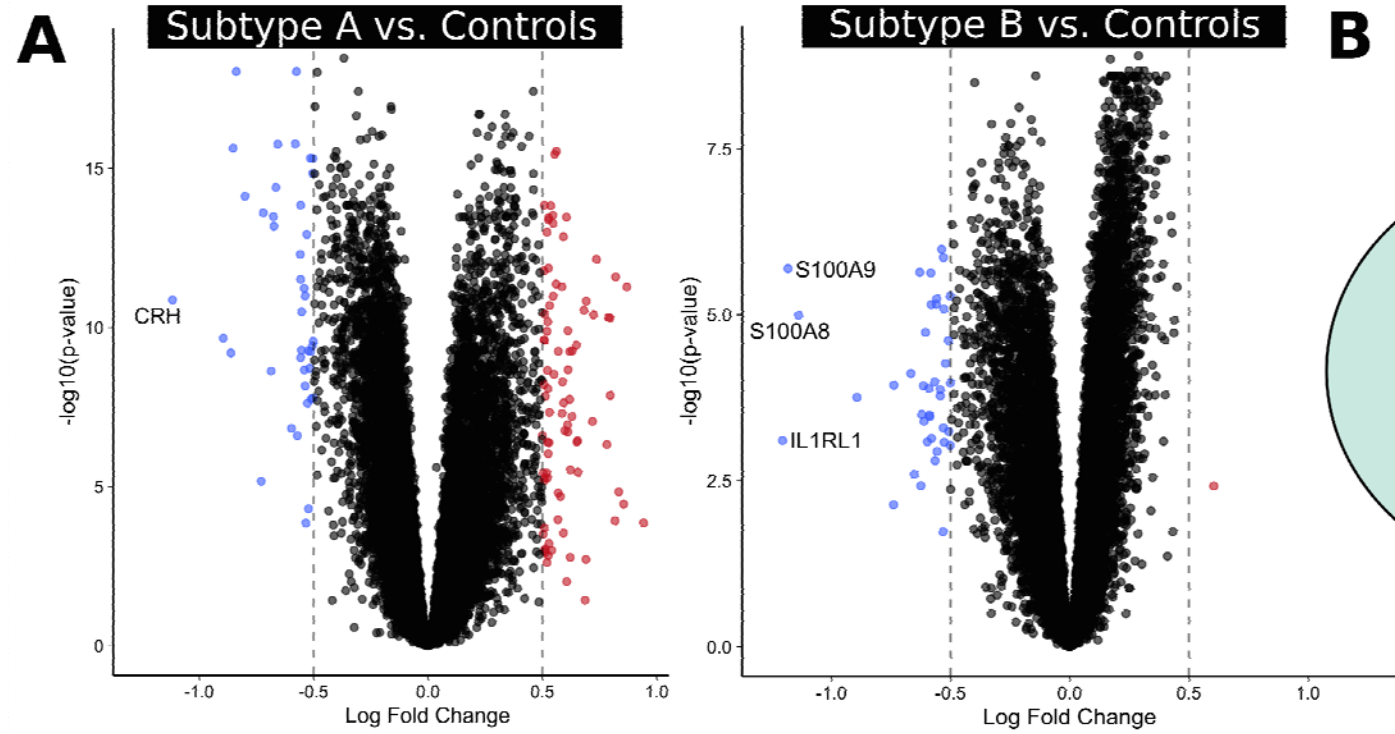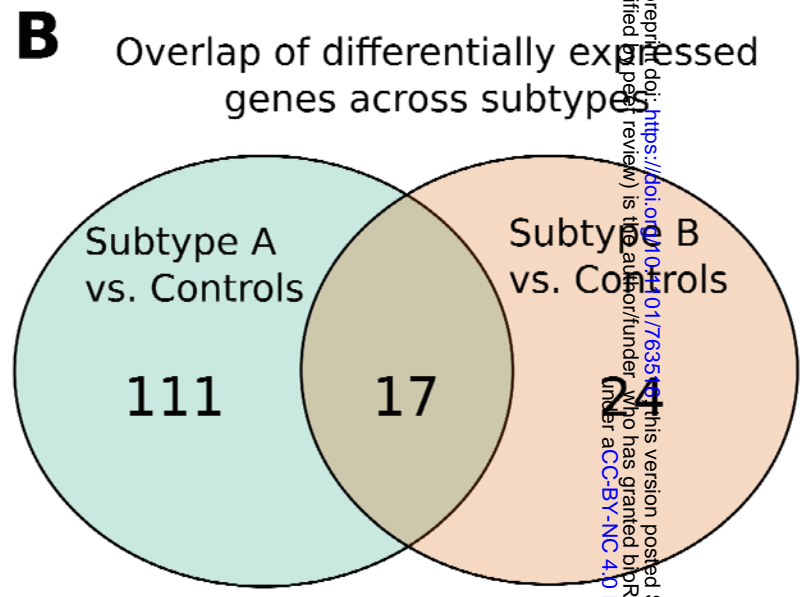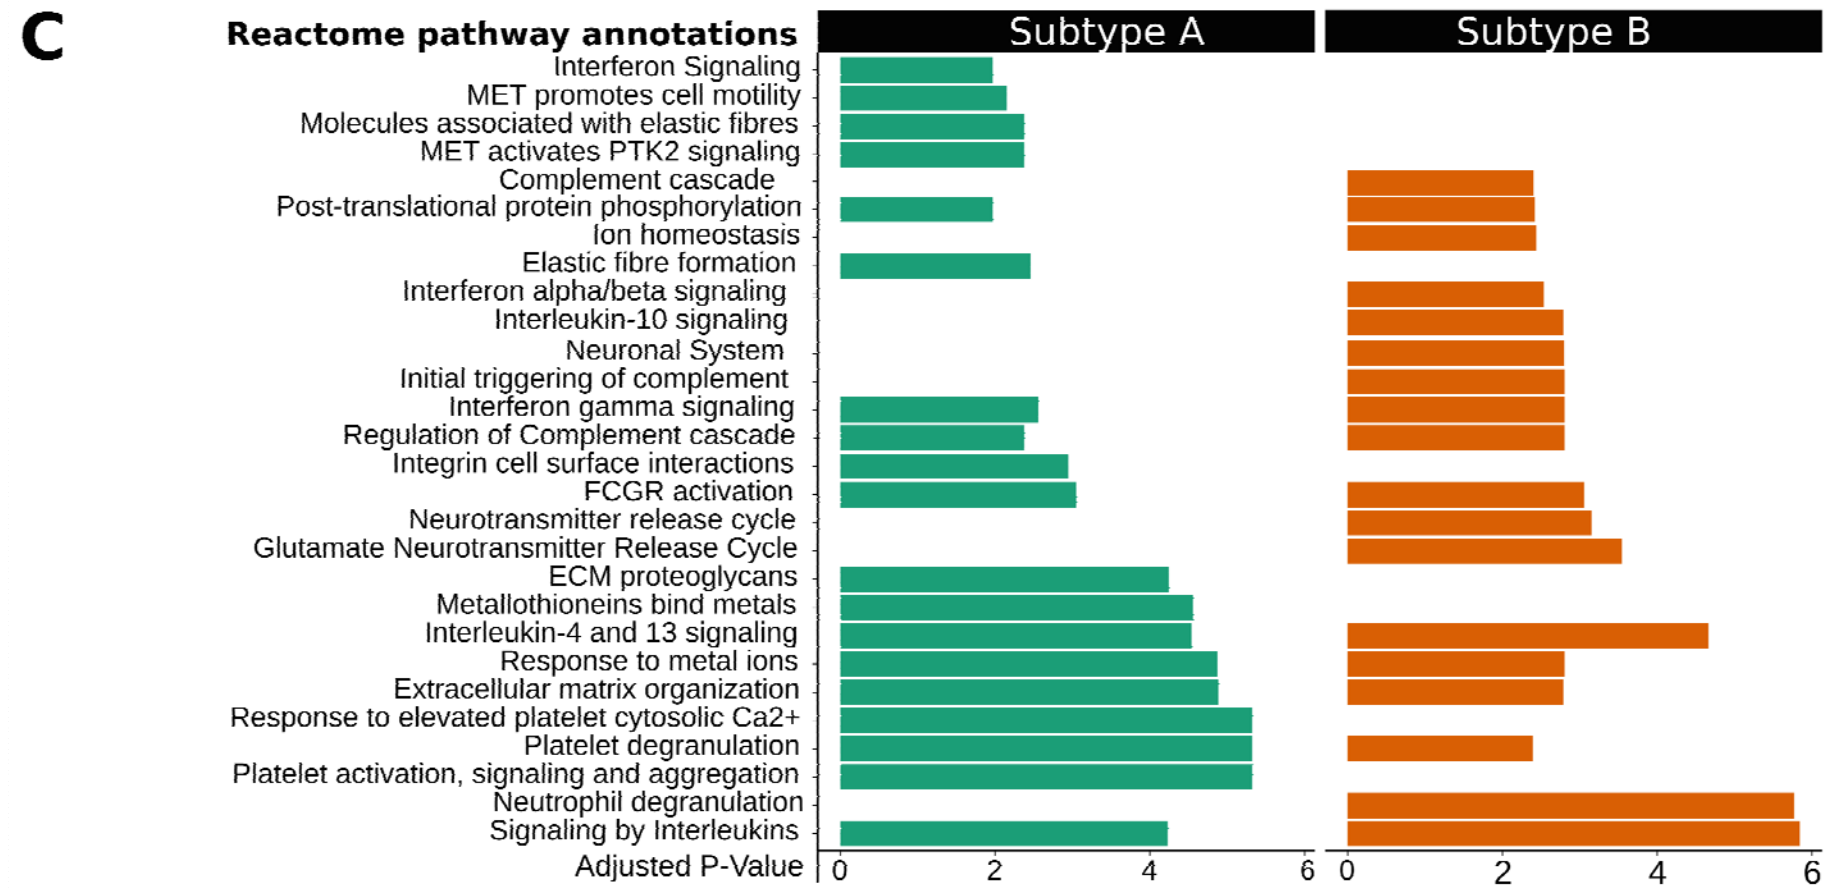

bioRxiv preprint doi: <https://doi.org/10.1101/176351>; this version posted September 11, 2019. The copyright holder for this preprint (which was not certified by peer review) is the author/funder, who has granted bioRxiv a license to display the preprint in perpetuity. It is made available under aCC-BY-NC 4.0 International license.

615  
616

617  
618  
619  
620  
621  
622

**Figure 5: Differential expression analysis of ROSMAP subtypes reveals heterogeneity in inflammatory response in LOAD cases.** (A) Differential expression analysis comparing each subtype to control decedents for the DLPFC region was performed using the limma R package. We show up-regulated (red,  $p < 0.05$ , log fold change  $> 0.5$ ) and down-regulated (blue,  $p < 0.05$ , log fold change  $< -0.5$ ) genes in the volcano plot and label genes that have an absolute log fold change of greater than 1 (dotted lines). (B) Differentially expressed genes ( $p < 0.05$ , absolute log fold change  $> 0.5$ ) from the analysis show a partial overlap between subtypes. (C) Top Reactome pathways for differentially expressed genes for both subtypes are reported. Subtype A demonstrates an enrichment of immune and stress-response related pathways across up-regulated genes, while Subtype B demonstrates a down-regulation of a set of specific immune-related pathways linked to S100A8/A9 activation.

bioRxiv preprint doi: <https://doi.org/10.1101/763516>; this version posted September 11, 2019. The copyright holder for this preprint (which was not certified by peer review) is the author/funder, who has granted bioRxiv a license to display the preprint in perpetuity. It is made available under aCC-BY-NC 4.0 International license.

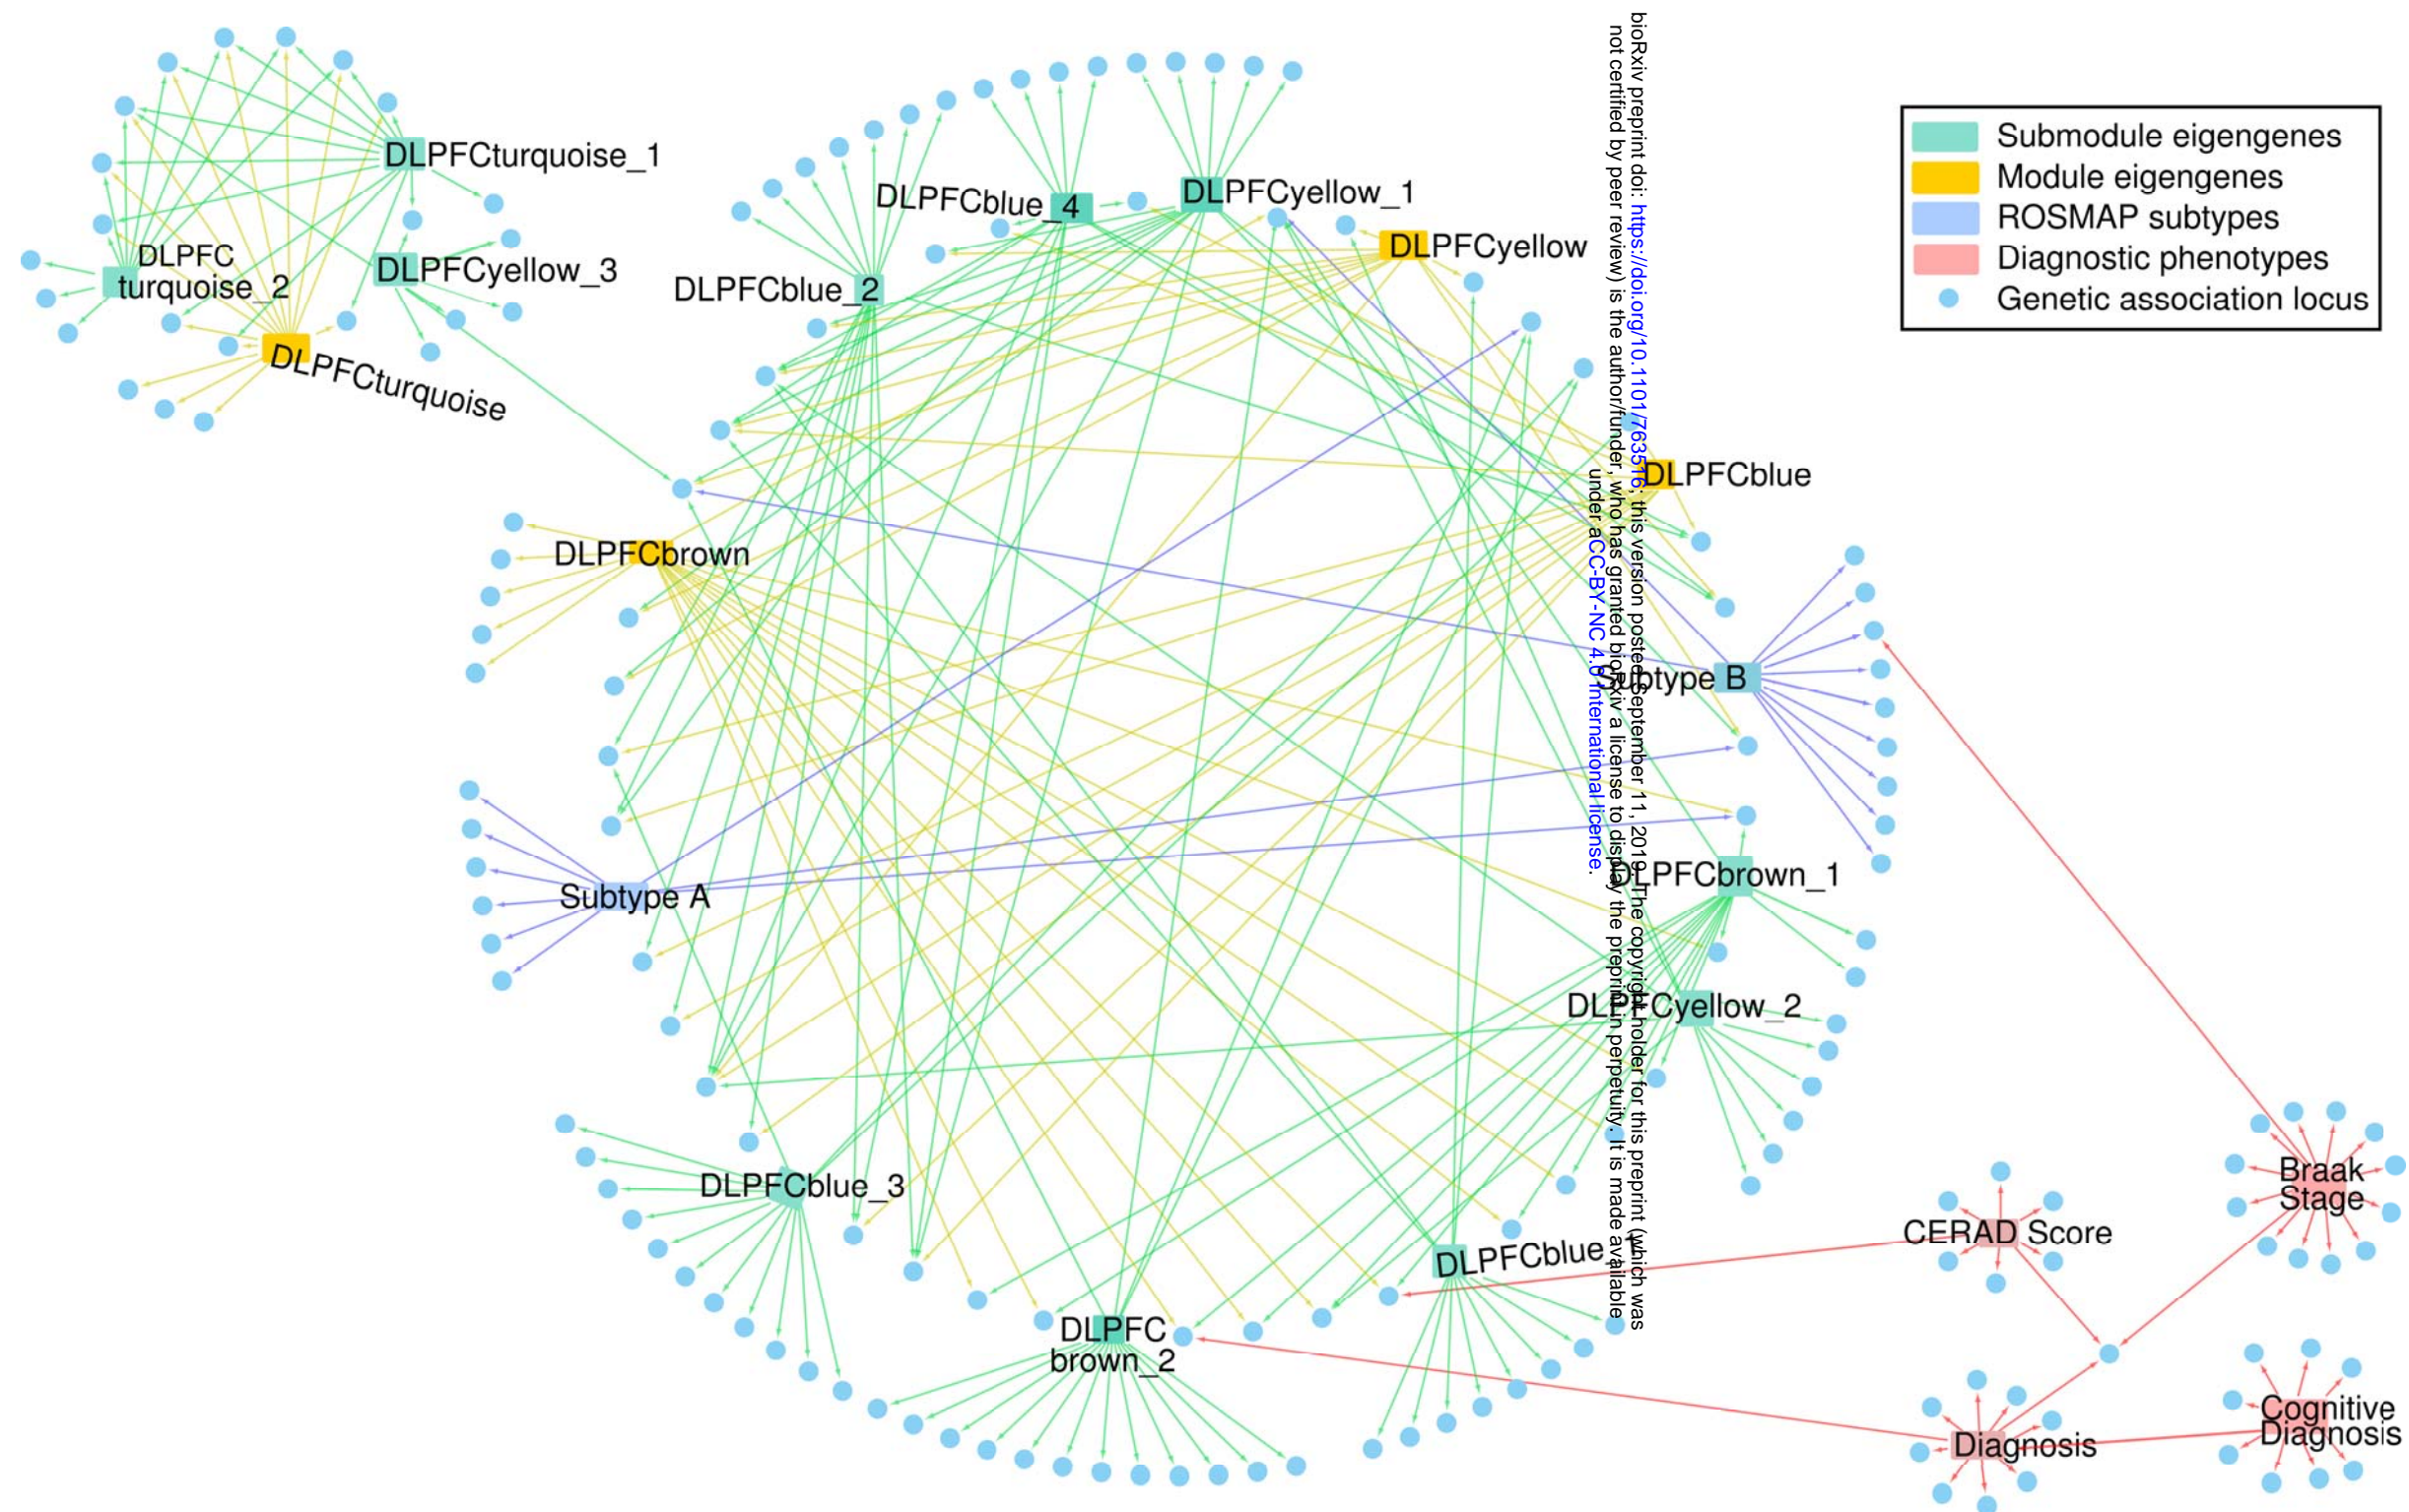

623 **Figure 6: Network of phenotypes and associated loci.** We created a directed network describing the loci detected from the multiple analyses in this study. Blue nodes represent loci associated with a phenotype.  
 624 Red nodes represent phenotypes. An edge from a phenotype to a genetic locus signifies that the locus is associated with the specified phenotype. Diagnostic phenotypes (red edges) were associated with some of  
 625 the loci detected in this study. The module eigengenes (yellow edges), submodule eigengenes (green edges), and subtypes (blue edges) were associated with overlapping and unique loci (center and left). A  
 626 community of loci was associated with multiple submodules associated with microglia, endothelial cells, astrocytes, and oligodendrocytes (center). A small community of loci was associated with submodules related  
 627 to proteostasis (left). Diagnostic phenotypes included CERAD scores, Braak stages, cognitive diagnosis, and case-control association.  
 628
